# Supplementary material for: Mutant IDH1 Promotes Glioma Formation In Vivo
Source: PubMed Central journal article supplement — Cell Rep. Author manuscript; Available in PMC 2018 Jul 5. (PMC6032974; doi:10.1016/j.celrep.2018.03.133), 2018-05-01
Supplement: NIHMS965703-supplement-1.pdf [file NIHMS965703-supplement-1.pdf]

Cell Reports, Volume 23

## Supplemental Information

### Mutant *IDH1* Promotes Glioma Formation *In Vivo*

Beatrice Philip, Diana X. Yu, Mark R. Silvis, Clifford H. Shin, James P. Robinson, Gemma L. Robinson, Adam E. Welker, Stephanie N. Angel, Sheryl R. Tripp, Joshua A. Sonnen, Matthew W. VanBrocklin, Richard J. Gibbons, Ryan E. Looper, Howard Colman, and Sheri L. Holmen

## Supplemental Experimental Procedures

### *Genotyping*

Genotyping for the TVA transgene was carried out in 25  $\mu$ L total volume containing 2.5  $\mu$ L 10X PCR buffer (Life Technologies), 10  $\mu$ L DMSO, 125  $\mu$ L 50 mmol/l  $MgCl_2$ , 0.625 mmol/l of each nucleotide, 1 unit of Taq polymerase (Life Technologies), 6.25  $\mu$ g/ml of primers TVA-386 sense and TVA-786 antisense to detect a 400-bp fragment. Samples were amplified for 30 cycles (94 °C for 30 seconds, 56 °C for 30 seconds, and 72 °C for 45 seconds) (Shin et al., 2017). PCR to detect a 180-bp *Cdkn2a<sup>lox/lox</sup>* allele and a 140-bp wild-type *Cdkn2a* allele was carried out with specific primers. Cycling conditions are 94 °C for 1 min followed by 30 cycles of 94 °C for 30 s, annealing for 30 s at 55 °C, elongation for 30 s and a final extension at 72 °C for 7 minutes (Shin et al., 2017). Genotyping for *Pten<sup>lox</sup>*, and wild-type alleles was performed to detect 1000-bp *Pten<sup>lox</sup>* allele and an 811-bp *Pten* wild type allele using CFP1, R1NEOCP and PTR14 primers. Cycling conditions are 95 °C for 3 min followed by 28 cycles of 95 °C for 1 min, annealing for 1 min at 60 °C and elongation at 72 °C for 1 min and a final extension at 72 °C for 6 min (Shin et al., 2017). PCR to detect a 2500-bp *Atrx<sup>lox</sup>* allele and a 2000-bp wild-type *Atrx* allele was carried out using AccuStart II PCR SuperMix (Quantabio) per the manufacturer's specifications. Cycling conditions were as follows: 94 °C for 2 min followed by 34 cycles of 94 °C for 15 s, annealing for 30 s at 55 °C and elongation at 72 °C for 3 minutes.

### *Viral constructs and propagation*

The avian retroviral vectors used in this study are replication-competent Avian Leukosis Virus (ALV) with Bryan polymerase subgroup A (designated RCASBP(A) and abbreviated RCAS). RCAS-X was a gift from Harold Varmus. RCAS-*Cre* has been described previously (Robinson et al., 2010). RCAS-*PDGFA* was cloned using LR recombination from the Gateway PLUS shuttle X03795.1 (Genecopoeia). *IDHI* (ENST00000345146.6) was PCR amplified from a cDNA library generated from normal human astrocytes (ScienCell Research Laboratories). The R132H mutation and C-terminal HA epitope tag were introduced using PCR (primer sequences are available upon request). The PCR products were cloned into the pCR8/GW/Topo vector (Thermo Fisher Scientific (TFS)), bidirectionally verified using Sanger sequencing, and Gateway cloned into the RCAS destination vector using LR Clonase II per the manufacturer's specifications (TFS). Viral infection was initiated by calcium phosphate transfection of proviral DNA into DF-1 avian fibroblasts. DF-1 cells were maintained in DMEM with 10% FBS, 100 IU/ml gentamicin, and 100 units/ml penicillin/streptomycin at 37 °C. Viral spread was monitored by expression of the p27 viral capsid protein as determined by western blot (Shin et al., 2015).

### *Viral delivery in vivo*

Infected DF-1 cells from a confluent 10-cm culture dish were pelleted and re-suspended in 50 µl HBSS. Newborn pups were injected 2 mm ventral to Bregma with 5 µl of cell suspension using a gas-tight Hamilton syringe. In order to directly compare all of the different groups of mice in our study, three viruses were delivered to each mouse to maintain equal amounts of virus for each cohort. In groups with fewer than three delivered genes, an empty vector (RCAS-X) was co-injected to effectively dilute viral ratios to those equal to what would be expected for injections with three RCAS viruses.

### *Histological analysis*

Brain tissue from injected mice was isolated, fixed in neutral buffered formalin (NBF), and paraffin embedded. 5 µm sections from tissue blocks were adhered to glass slides and stained by H&E or left unstained for further analysis.

### *Immunohistochemistry (IHC)*

Tissue sections were deparaffinized as previously described (Vanbrocklin et al., 2012). IHC was performed with the following antibodies: HA (1/250), OLIG2 (1/300), ATRX (1/250), GFAP (1/200) PTEN (1/150), p19ARF (1/250), Ki67 (1/100), Endomucin (1/300) and IDH1<sup>R132H</sup> (1/30), 5hmc (1/2500), and PDGFA (1/250). Specific details regarding the staining procedures are available upon request. Slides were imaged on a Zeiss Axio microscope equipped with a 5 megapixel camera.

### *Development of primary astrocyte cell lines*

N::TVA;Cdkn2a<sup>lox/lox</sup> astrocytes have been described (Robinson et al., 2010). N::TVA;Atrx<sup>lox/lox</sup>; N::TVA;Cdkn2a<sup>lox/lox</sup>;Atrx<sup>lox/lox</sup>; and N::TVA;Cdkn2a<sup>lox/lox</sup>;Atrx<sup>lox/lox</sup>;Pten<sup>lox/lox</sup> primary astrocytes were established following dissection of newborn mouse brain tissue by physical disruption into single cells using scalpels and 0.25% trypsin. Cell cultures were maintained in DMEM (Invitrogen) containing 10% FBS, 100 IU/ml gentamicin, and 100 units/ml penicillin/streptomycin.

### *Viral infections in vitro*

Astrocytes from newborn mice were seeded in six-well plates at a density of  $5 \times 10^4$  cells/well and were maintained in DMEM with 10% FBS, 100 IU/ml gentamicin, and 100 units/ml penicillin/streptomycin at 37 °C. Prior to infection, the media was removed and replaced with 1 ml of filtered virus-containing media with 8 mg/ml polybrene

(Sigma) and incubated overnight at 37 °C. Infected astrocyte cultures were maintained as described above except the culture media was supplemented with 2 mM glutamine.

#### *Immunoblotting*

Whole cell lysates were collected using SDS-lysis buffer (200 mM Tris/HCl pH 6.8), 2% SDS, 0.1 M DTT, 10% Glycerol, 0.1% bromophenol Blue) or RIPA buffer with the addition of protease inhibitor cocktail (Bio-Rad Laboratories). Proteins were separated on 8-16% Tris-glycine polyacrylamide gels or 6% polyacrylamide gels (Invitrogen) for proteins above 200 KDa and transferred to nitrocellulose or PVDF membranes. Blots were probed with the indicated primary and secondary antibodies, incubated with Amersham ECL Western Blotting Detection Reagents (GE Healthcare), and exposed to film. Primary antibodies used were: Rabbit anti-IDH1 (1:1000); Mouse anti-IDH<sup>R132H</sup> (1:1000) Mouse anti-GAPDH (1:1000); Rabbit anti-HA (1:1000); Rabbit polyclonal PDGFA (1:1000); Rabbit polyclonal ATRX (1:1000) Rabbit anti-PTEN (1:1000); p19ARF (1:1000). HRP-conjugated secondary antibodies used were: anti-Mouse IgG (1:1000) and anti-Rabbit IgG (1:1000). The source of the antibodies used is indicated in the Resource Table.

#### *Synthesis of TFMB-(R)-2HG*

To a solution of (*R*) oxotetrahydrofuran-2-carboxylic acid (650 mg, 5.0 mmol) in acetonitrile (15 ml) was added *i*-Pr<sub>2</sub>NEt (1.05 ml, 6.0 mmol, 1.2 equiv) and 3-(trifluoromethyl) benzyl bromide (0.92 ml, 6.0 mmol, 1.2 equiv). The mixture was heated to reflux for 10 minutes and allowed to stir at RT overnight. The mixture was concentrated under reduced pressure and the resulting residue taken up in ethyl acetate (50 ml). The organics were washed with 10% HCl (50 ml), 10% sat NaHCO<sub>3</sub> (50 ml) and brine (50 ml) and were dried over Na<sub>2</sub>SO<sub>4</sub>. Concentration gave a light yellow oil which was purified on silica gel, eluting with 1:1 hexanes:ethyl acetate to give the title compounds [(*R*)-enantiomer: 1.28 g, 89%] as a clear oil which later solidified upon standing in the freezer. Physical characteristics are detailed in (Losman et al., 2013).

#### *Proliferation assay*

Cell proliferation was assessed using an MTT (3-(4,5-Dimethylthiazol-2-yl)-2,5-Diphenyltetrazolium Bromide) (Life technologies) assay. Briefly, 1 × 10<sup>3</sup> cells were seeded into each well of a 96 well plate. MTT, 20 μl (final concentration 1 mg/ml), was added to the cells at 24, 48, and 72 h post culture and incubated for 4 h at 37 °C. For proliferation assays using 2-HG, the media was supplemented with 3 mM TFMB-(*R*)-2HG. Excess MTT reagent

was removed and the formazan crystals were dissolved in 100  $\mu$ l of DMSO and quantified via absorbance at 570 nm.

#### *Soft agar colony formation assay*

To assess anchorage-independent growth,  $1.5 \times 10^5$  cells were suspended in 0.35% Difco Noble Agar (Becton Dickinson) in DMEM with 10% FBS and layered onto 0.65% pre-solidified Difco Noble Agar in DMEM with 10% FBS. Culture media with or without 3mM TFMB-(R)-2HG was replenished every 3 days for 3 weeks.

#### *2-HG Analysis*

Two 10 cm plates of N::TVA;Cdkn2a<sup>lox/lox</sup>;Atrx<sup>lox/lox</sup>;Pten<sup>lox/lox</sup> primary astrocytes infected with viruses containing the genes indicated were pelleted and snap frozen at -80 °C. For mass spectrometry analysis of 2-HG, cells were suspended in 90% methanol containing d<sub>4</sub>-succinate. Absolute concentrations of R-2-HG in samples were determined from a calibration curve. Samples were extracted in 1 ml 90% ice cold MeOH, then spiked with the internal standard (10 ng of d<sub>3</sub>-2-HG), sonicated for 2 min and then incubated at -20 °C for 1 hr. Samples were then centrifuged at 4 °C for 10 min at 15,000 G. The supernatants were dried overnight in a speedVac. Samples were derivatized by the addition of 160  $\mu$ l N-(p-toluenesulfonyl-L-phenylalanyl chloride (TSPC)) [1.25 mM in anhydrous acetonitrile (ACN)] and 2  $\mu$ l of pyridine followed by 10 min incubation at room temperature, desiccated, resuspended in 100  $\mu$ l ACN/H<sub>2</sub>O (1:1) and transferred to a glass LC/MS vial for analysis. All experiments were performed using an Agilent 1290 Infinity UHPLC system and an Agilent 6490 triple quadrupole (QqQ) mass spectrometer interfaced with an Electron spray ionization (ESI) source. Separations were achieved using a RP column (Phenomenex Luna 5  $\mu$ m C18 (2) 250  $\times$  2.1 mm) operated at room temperature, while the autosampler was set at 4 °C. Injection volume was 3  $\mu$ l. The chromatography gradient is isocratic for 18 min consisting of 38% mobile phase A (0.1% FA in water) and 62% mobile phase B (1:1 ACN:MeOH), then brought to 99% mobile phase B at 19 min and held for 6 min, and then returned to initial conditions and equilibrated for 8 min using a flow rate of 0.5 ml/min. The Agilent 6490 triple quadrupole mass was operated in the negative ion mode. The mass transitions (precursor  $\rightarrow$  product ions) were 448.1  $\rightarrow$  317.9 and 448.1  $\rightarrow$  154.8 for TSPC-2HG, and 451.1  $\rightarrow$  317.9 and 451.1  $\rightarrow$  154.8 for internal standard d<sub>3</sub>-TSPC-2HG. The MRM acquisition parameters used were as follows: 4000 V capillary voltage, 500 V nozzle voltage, 12 l/min sheath gas flow at a temperature of 350 °C (ultra-high purity nitrogen), 11 l/min drying gas flow at a temperature of 150 °C, 35 psi nebulizer gas flow, 380 V default fragmentor voltage, 4 V or 1 V transition-specific cell accelerator potential, 9 - 41 V transitions-specific collision energy (CE),

and unit resolution. The MRM parameters were optimized to achieve maximum sensitivity. Results from LC-MS experiments were collected using Agilent Mass Hunter Workstation B.07.01 and analyzed using the software packages Mass Hunter Quant B.07.00 and Microsoft Excel.

#### *NADPH assay*

IDH1 activity was measured using an Isocitrate Dehydrogenase Activity Colorimetric Assay Kit (BioVision) per the manufacturer's protocol. Briefly,  $1 \times 10^6$  cells were washed in ice cold PBS and homogenized in 200  $\mu$ l IDH assay buffer. Five  $\mu$ g of protein extracted from each sample was transferred to a 96-well plate and mixed with the assay reaction mix in 1:1 ratio in triplicate. The plate was incubated at 37 °C and OD 450 was recorded every 5 min for 2 h using the Synergy HT Multi-Detection Microplate Reader (Bio-Tek). NADPH values were calculated from standard curves.

#### *Immuno-Fluorescent In Situ Hybridization (Immuno-FISH)*

To detect the ALT phenotype in tumor tissue, we performed Immuno-FISH. Briefly, 5  $\mu$ m sections were deparaffinized and subjected to heat induced antigen retrieval. Slides were washed with PBS, incubated in 0.005% pepsin solution for 5 min at 37 °C, followed by 2 washes in PBS and dehydration in ice cold ethanol. 200 nM of Alexa Fluor 488 conjugated C rich telomere probe (PNA Bio) prepared in 20  $\mu$ l hybridization buffer (Roche Diagnostics) was applied to the slides and incubated for 10 min at 85 °C followed by 2 h incubation in the dark to allow hybridization. Post hybridization, the slides were incubated with PML antibody for 1 h followed by incubation with Alexa Fluor 594 conjugated donkey anti-mouse secondary antibody. Cell nuclei were counterstained with Hoechst 33342 (Life Technologies) and mounted with ProLong Gold Antifade reagent (Life Technologies). Slides were imaged using a 100X oil immersion objective on a Zeiss Axioskop 2 MOT Plus fluorescence microscope.

#### *Bioinformatics and Genomics*

For RNAseq analysis, mouse tumors were microdissected from 10  $\mu$ m FFPE sections and extracted using the Ambion Recoverall Kit (Ambion). Samples were prepped with TruSeq Stranded Total RNA with Ribo-Zero Gold and then sequenced on HiSeq 50 Cycle Single-Read Sequencing v4 (Illumina). Reads were aligned to the mouse genome (mm10) and differential gene expression was determined with the open source USeq/DESeq2 package. Genes were selected using two thresholds, an FDR of <10% and absolute log<sub>2</sub> ratio > 1. GBM classifier genes were accessed from the TCGA data portal and were converted to mouse orthologues genes using Biomart (Verhaak et al., 2010). GSEA (v2. 2.0) was used to analyze the enrichment of signature gene sets from different GBM subtypes as

described (Lu et al., 2016). For Methylation array, Bisulfite sequencing library was prepared using an Agilent SureSelect XT Mouse Methyl-Seq capture kit following manufacturer's recommendations. The library was sequenced on an Illumina HiSeq 2500 multiplexed with 4 samples per lane. Reads were de-multiplexed and converted to Fastq using Illumina's pipeline. Reads were aligned to the mouse genome (build mm10, UCSC) using Novocraft Novoalign ([www.novocraft.com](http://www.novocraft.com), version 3.7.1) in bisulfite mode using options -b 2 -t 360 -h 120 -r random. Duplicate alignments were removed using Picard MarkDuplicates (<http://broadinstitute.github.io/picard/index.html>, version 2.9.0). Bisulfite analysis was performed with the USeq application (<https://github.com/HuntsmanCancerInstitute/USeq/tree/master/Source>, version 9.0.8). Cytosine methylation observations were converted to point data using USeq NovoalignBisulfiteParser, increasing minimum base quality to 20 and minimum map quality to 13. Point data was filtered for CpG contexts using USeq ParsePointDataContexts. For regional differential methylation analysis, USeq DefinedRegionBisSeq was run with a minimum base read coverage of 10. There were 220,894 target regions tested, representing intervals with a minimum mean base coverage of 10 reads across all samples and a minimum length of 100-bp. They were identified using Macs2 bdgpeakcall with a bedgraph representation of average read depth across all samples. Differentially methylated regions were filtered using criteria of absolute pseudomedian log<sub>2</sub> ratio difference  $\geq 1.0$  and a  $-10\log_{10}$  transformed Benjamini & Hochberg corrected FDR $>30$ . To generate the regional methylation score, USeq ScoreMethylatedRegions was run with a minimum read coverage of 10 over the filtered targets; targets without a score across all samples were removed. Heat maps and figures were generated in R using the collected region sum fraction methylation score. Differentially methylated targets were annotated with the R package Chipseeker.

#### *Cell viability assays*

High-throughput *in vitro* cell viability assays were performed at the University of Utah Drug Discovery Core facility. Briefly, the activity levels of TMZ and olaparib as single agents in mouse astrocytes was determined by high-throughput CellTiter-Glo cell viability assay (Promega). Cells ( $1 \times 10^3$ ) were plated in each well of 384-well plates using the Tecan EVO100/MCA384 liquid handling station in a sterile bio-hood and incubated overnight. Drugs were added to the wells 24 hours after cell plating using the Tecan D300e Digital Dispenser, which allows for picoliter to microliter non-contact dispensing of small molecules directly into the assay plate without the need for serial dilutions. Each drug concentration was applied to 4 replicate wells with four additional control wells receiving vehicle only. After 72 hours of drug incubation, CellTiter-Glo reagent was added to each well at 1:1 ratio (v/v) with

the media using the BioTek Microplate Dispenser and incubated for 30 min at room temperature. Luminescence was measured on the Synergy 4 Microplate Reader. Percent viability was calculated and used to determine IC50 values.

### Resource Table

| REAGENT or RESOURCE                                                                                           | SOURCE               | IDENTIFIER              |
|---------------------------------------------------------------------------------------------------------------|----------------------|-------------------------|
| Antibodies                                                                                                    |                      |                         |
| Mouse anti-IDH1 <sup>R132H</sup>                                                                              | HistoBioTec          | Cat#DIA-H09             |
| Mouse anti-PTEN (6H2.1)                                                                                       | Dako                 | Cat#M3627               |
| Mouse anti-PML                                                                                                | Millipore            | Cat#MAB3738             |
| Mouse anti-GAPDH                                                                                              | Millipore            | Cat#MAB374              |
| Mouse anti-5hmC                                                                                               | Active Motif         | Cat#39769               |
| Rabbit anti-HA                                                                                                | Cell Signaling       | Cat# 3724               |
| Rabbit anti-Olig 2                                                                                            | Millipore            | Cat#Ab9610              |
| Rabbit anti-ATRX (H-300)                                                                                      | Santa Cruz           | Cat#SC-15408            |
| Rabbit anti-CDKN2A/p19ARF                                                                                     | Abcam                | Cat#ab80                |
| Rabbit anti-IDH1 (D2H1)                                                                                       | Cell Signaling       | Cat#8137                |
| Rabbit anti-PTEN (D4.3)                                                                                       | Cell Signaling       | Cat#9188                |
| Rabbit anti-PDGFA (N30)                                                                                       | Santa Cruz           | Cat#SC-128              |
| Rabbit anti-p19ARF                                                                                            | Thermo Fisher        | Cat#PA1-30670           |
| Rat anti-GFAP mAb (2.2B10)                                                                                    | Thermo Fisher        | Cat#130300              |
| Rat anti-Endomucin (V.7C7)                                                                                    | Santa Cruz           | Cat#65495               |
| Rat anti-Ki67                                                                                                 | Dako                 | Cat#M7249               |
| Anti-mouse HRP conjugated                                                                                     | Cell Signaling       | Cat#7076s               |
| Anti-rabbit HRP conjugated                                                                                    | Cell Signaling       | Cat#7074                |
| Alexa flour 594 conjugated donkey anti-mouse                                                                  | Thermo Fisher        | Cat#R37115              |
| Bacterial and Virus Strains                                                                                   |                      |                         |
| <i>Escherichia coli</i> : recA1 endA1 gyrA96 thi-1 hsdR17 supE44 relA1 lac [F' proAB lacIq ZΔM15 Tn10 (Tetr ) | Agilent Technologies | XL1-Blue<br>Cat# 200249 |



|                                                                                                                                    |                             |                                                              |
|------------------------------------------------------------------------------------------------------------------------------------|-----------------------------|--------------------------------------------------------------|
| <i>Escherichia coli</i> : F- mcrA Δ(mrr-hsdRMS-mcrBC)<br>φ80lacZΔM15 ΔlacX74 recA1 araD139 Δ(ara-leu)7697 galU<br>galK rpsL (StrR) | Thermo Fisher Scientific    | One Shot™ TOP10<br>Cat# C404010                              |
| <i>Escherichia coli</i> : F- mcrA Δ(mrr-hsdRMS-mcrBC)<br>Φ80lacZΔM15 ΔlacX74 recA1 araΔ139 Δ(ara-leu)7697 galU<br>galK rpsL (StrR) | Thermo Fisher Scientific    | One Shot™ ccdB<br>survival™ 2 T1 <sup>R</sup><br>Cat# A10460 |
| <i>Escherichia coli</i> : F- φ80(lacZ)ΔM15 ΔlacX74 hsdR(rK-mK+)<br>ΔrecA1398 endA1 tonA                                            | Thermo Fisher<br>Scientific | One Shot™ Mach1™<br>T1<br>Cat# C862003                       |
| RCAS: replication-competent avian leukosis virus long<br>terminal repeat with splice acceptor Bryan polymerase<br>subgroup A       | (Robinson et al., 2010)     | NA                                                           |
| Biological Samples                                                                                                                 |                             |                                                              |
| Mouse brain tissue                                                                                                                 | This paper                  |                                                              |
| Mouse tail biopsies                                                                                                                | This paper                  |                                                              |
| Chemicals, Peptides, and Recombinant Proteins                                                                                      |                             |                                                              |
| Pepsin                                                                                                                             | Sigma                       | Cat#P6887-1G                                                 |
| Hoechst 33342                                                                                                                      | Life Technologies           | Cat#H3570                                                    |
| Prolong Gold anti-fade                                                                                                             | Life Technologies           | Cat# <u>P10144</u>                                           |
| Temozolomide                                                                                                                       | Selleck Chemical            | Cat#S1237                                                    |
| Olaparib                                                                                                                           | Selleck Chemical            | Cat#S1060                                                    |
| TFMB-(R)-2HG                                                                                                                       | (Losman et al., 2013)       |                                                              |
| Critical Commercial Assays                                                                                                         |                             |                                                              |
| RecoverAll™ Total Nucleic Acid Isolation Kit for FFPE                                                                              | Thermo Fisher               | Cat#AM1975                                                   |
| Ribo Zero Gold                                                                                                                     | Illumina                    | Cat#RS-122-2202                                              |
| Isocitrate dehydrogenase kit                                                                                                       | BioVision                   | Cat#K756-100                                                 |
| SureSelectXT Mouse Methyl-seq Reagent Kit                                                                                          | Agilent                     | Cat#931052                                                   |
| Qiagen DNEasy Kit                                                                                                                  | Qiagen                      | Cat#69504                                                    |
| CellTiter-Glo® Luminescent Cell Viability Assay                                                                                    | Promega                     | Cat#G7572                                                    |

| Deposited Data                                                                                                      |                         |                                                                                                                                         |
|---------------------------------------------------------------------------------------------------------------------|-------------------------|-----------------------------------------------------------------------------------------------------------------------------------------|
| RNA seq processed data                                                                                              | This paper              | <a href="https://www.ncbi.nlm.nih.gov/geo/query/acc.cgi?acc=GSE107616">https://www.ncbi.nlm.nih.gov/geo/query/acc.cgi?acc=GSE107616</a> |
| Methylation array processed data                                                                                    | This paper              | <a href="https://www.ncbi.nlm.nih.gov/geo/query/acc.cgi?acc=GSE107616">https://www.ncbi.nlm.nih.gov/geo/query/acc.cgi?acc=GSE107616</a> |
| Experimental Models: Cell Lines                                                                                     |                         |                                                                                                                                         |
| N:: <i>TVA</i> ; <i>Cdkn2a</i> <sup>lox/lox</sup>                                                                   | (Robinson et al., 2010) | N/A                                                                                                                                     |
| N:: <i>TVA</i> ; <i>Cdkn2a</i> <sup>lox/lox</sup> ; <i>Atrx</i> <sup>lox/lox</sup> ; <i>Pten</i> <sup>lox/lox</sup> | This paper              | N/A                                                                                                                                     |
| N:: <i>TVA</i> ; <i>Cdkn2a</i> <sup>lox/lox</sup> ; <i>Atrx</i> <sup>lox/lox</sup>                                  | This paper              | N/A                                                                                                                                     |
| IDH1 <sup>R132H</sup> mouse tumor-derived cells                                                                     | This paper              | N/A                                                                                                                                     |
| IDH1 <sup>wt</sup> mouse tumor-derived cells                                                                        | This paper              | N/A                                                                                                                                     |
| DF-1                                                                                                                | ATCC                    | Cat#CRL-12203                                                                                                                           |
| Experimental Models: Organisms/Strains                                                                              |                         |                                                                                                                                         |
| N:: <i>TVA</i> ; <i>Cdkn2a</i> <sup>lox/lox</sup> ; <i>Atrx</i> <sup>lox/lox</sup> ; <i>Pten</i> <sup>lox/lox</sup> | This paper              | N/A                                                                                                                                     |
| N:: <i>TVA</i> ; <i>Cdkn2a</i> <sup>lox/lox</sup> ; <i>Atrx</i> <sup>lox/lox</sup>                                  | This paper              | N/A                                                                                                                                     |
| N:: <i>TVA</i> ; <i>Cdkn2a</i> <sup>lox/lox</sup> ; <i>Pten</i> <sup>lox/lox</sup>                                  | (Shin et al., 2017)     | N/A                                                                                                                                     |
| N:: <i>TVA</i> ; <i>Atrx</i> <sup>lox/lox</sup> ; <i>Pten</i> <sup>lox/lox</sup>                                    | This paper              | N/A                                                                                                                                     |
| N:: <i>TVA</i> ; <i>Cdkn2a</i> <sup>lox/lox</sup>                                                                   | (Robinson et al., 2010) | N/A                                                                                                                                     |
| N:: <i>TVA</i> ; <i>Pten</i> <sup>lox/lox</sup>                                                                     | (Shin et al., 2017)     | N/A                                                                                                                                     |
| N:: <i>TVA</i> ; <i>Atrx</i> <sup>lox/lox</sup>                                                                     | This paper              | N/A                                                                                                                                     |
| Oligonucleotides                                                                                                    |                         |                                                                                                                                         |
| Primers for <i>TVA</i><br>386 5'-AGCTGGTGAGATGGGACTGAAC-3'<br>786 5'-CGAACATTCAAAGCCTCCAG-3'                        | IDT                     | N/A                                                                                                                                     |
| <i>Cdkn2a</i><br>Fwd 5'-TTGTTGGCCAGGATGCCGACATC-3'<br>Rev 5'-CCAAGTGTGCAAACCCAGGCTCC-3'                             | IDT                     | N/A                                                                                                                                     |

|                                                                                                                                                                               |               |                                                                                                                       |
|-------------------------------------------------------------------------------------------------------------------------------------------------------------------------------|---------------|-----------------------------------------------------------------------------------------------------------------------|
| Primers for <i>Atrx</i><br><br>PPS1.15:<br><br>5'GGTTTTAGATGAAAATGAAGAG-3'<br><br>Mxnp30: 5'CACCATCTTCTTGCCATCTCTGTAG-3'<br><br>Neo801:<br><br>5' GGG CGC CCG GTT CTT TT-3'   | IDT           | N/A                                                                                                                   |
| Primers for <i>Pten</i><br><br>CPF1:<br><br>5'CTTCGGAGCATGTCTGGCAATGC-3'<br><br>R1NEOCP:<br><br>5'CTGCACGAGACTAGTGAGACG TGC-3'<br><br>PTR14:<br><br>5'AAGGAAGAGGGTGGGGATAC-3' | IDT           | N/A                                                                                                                   |
| C-rich telomere probe: CCCTAACCCCTAACCCCTAA                                                                                                                                   | PNA Bio       | Cat#F1004                                                                                                             |
| Recombinant DNA                                                                                                                                                               |               |                                                                                                                       |
| pCR8 GW TOPO HA IDH1                                                                                                                                                          | This paper    | N/A                                                                                                                   |
| pCR8 GW TOPO HA IDH1 R132H                                                                                                                                                    | This paper    | N/A                                                                                                                   |
| pCR8 GW TOPO PDGFA                                                                                                                                                            | This paper    | N/A                                                                                                                   |
| RCAS HA IDH1                                                                                                                                                                  | This paper    | N/A                                                                                                                   |
| RCAS HA IDH1 R132H                                                                                                                                                            | This paper    | N/A                                                                                                                   |
| RCAS HA PDGFA                                                                                                                                                                 | This paper    | N/A                                                                                                                   |
| RCAS X                                                                                                                                                                        | Harold Varmus |                                                                                                                       |
| Software and Algorithms                                                                                                                                                       |               |                                                                                                                       |
| GraphPad Prism 7                                                                                                                                                              |               | <a href="https://www.graphpad.com/scientific-software/prism/">https://www.graphpad.com/scientific-software/prism/</a> |
| R statistical software Version 3.3.2                                                                                                                                          |               | <a href="https://www.r-project.org/">https://www.r-project.org/</a>                                                   |

|                                   |                        |                                                                                                                                                     |
|-----------------------------------|------------------------|-----------------------------------------------------------------------------------------------------------------------------------------------------|
| Useq software version 9.0.8       | (Nix et al., 2010)     | <a href="https://github.com/HuntsmanCancerInstitute/USeq/tree/master/Source">https://github.com/HuntsmanCancerInstitute/USeq/tree/master/Source</a> |
| Novocraft Novoalign version 3.7.1 |                        | <a href="http://www.novocraft.com">www.novocraft.com</a>                                                                                            |
| Image J                           | (Almeida et al., 2012) | <a href="http://imagej.nih.gov/ij/">http://imagej.nih.gov/ij/</a>                                                                                   |
| Mass Hunter Quant B.07.00         | Agilent technologies   |                                                                                                                                                     |
| Other                             |                        |                                                                                                                                                     |
|                                   |                        |                                                                                                                                                     |

### Contact for Reagent and Resource Sharing

Further information and requests for resources and reagents should be directed to and will be fulfilled by the Lead Contact, Sheri L. Holmen ([sheri.holmen@hci.utah.edu](mailto:sheri.holmen@hci.utah.edu)).

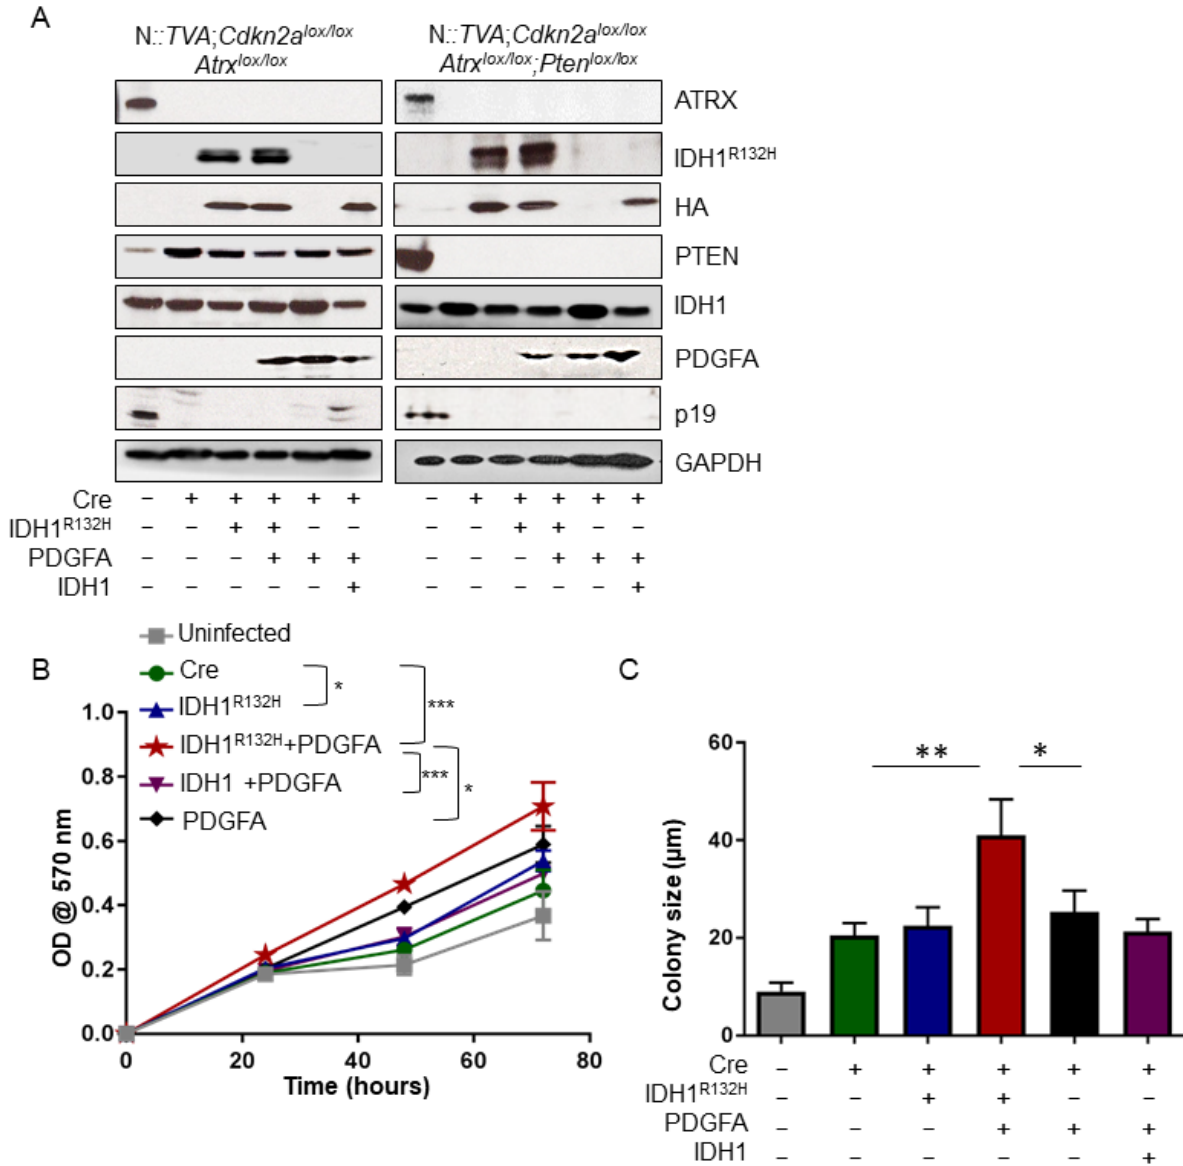

**Figure S1. IDH1<sup>R132H</sup> promotes proliferation and anchorage independent growth of immortal astrocytes.**

**Related to Figure 1.** (A) Western blot analysis of ATRX, IDH1<sup>R132H</sup>, HA, PTEN, IDH1, PDGFA, p19, and GAPDH in N::TVA;Cdkn2a<sup>lox/lox</sup>;Atrx<sup>lox/lox</sup> (left panel) and N::TVA;Cdkn2a<sup>lox/lox</sup>;Atrx<sup>lox/lox</sup>;Pten<sup>lox/lox</sup> mouse astrocytes (right panel) expressing the genes indicated. (B) Analysis of cell proliferation was determined by MTT assay of astrocytes derived from N::TVA;Cdkn2a<sup>lox/lox</sup>;Atrx<sup>lox/lox</sup> mice expressing the genes indicated. (C) Comparison of colony size from the soft agar colony formation assay shown in Figure 1B. Data are expressed as the mean ± S.E.M from three replicates. Statistical significance is shown by the following key: \*  $P < 0.05$ , \*\*  $P < 0.01$ , \*\*\*  $P < 0.001$ .

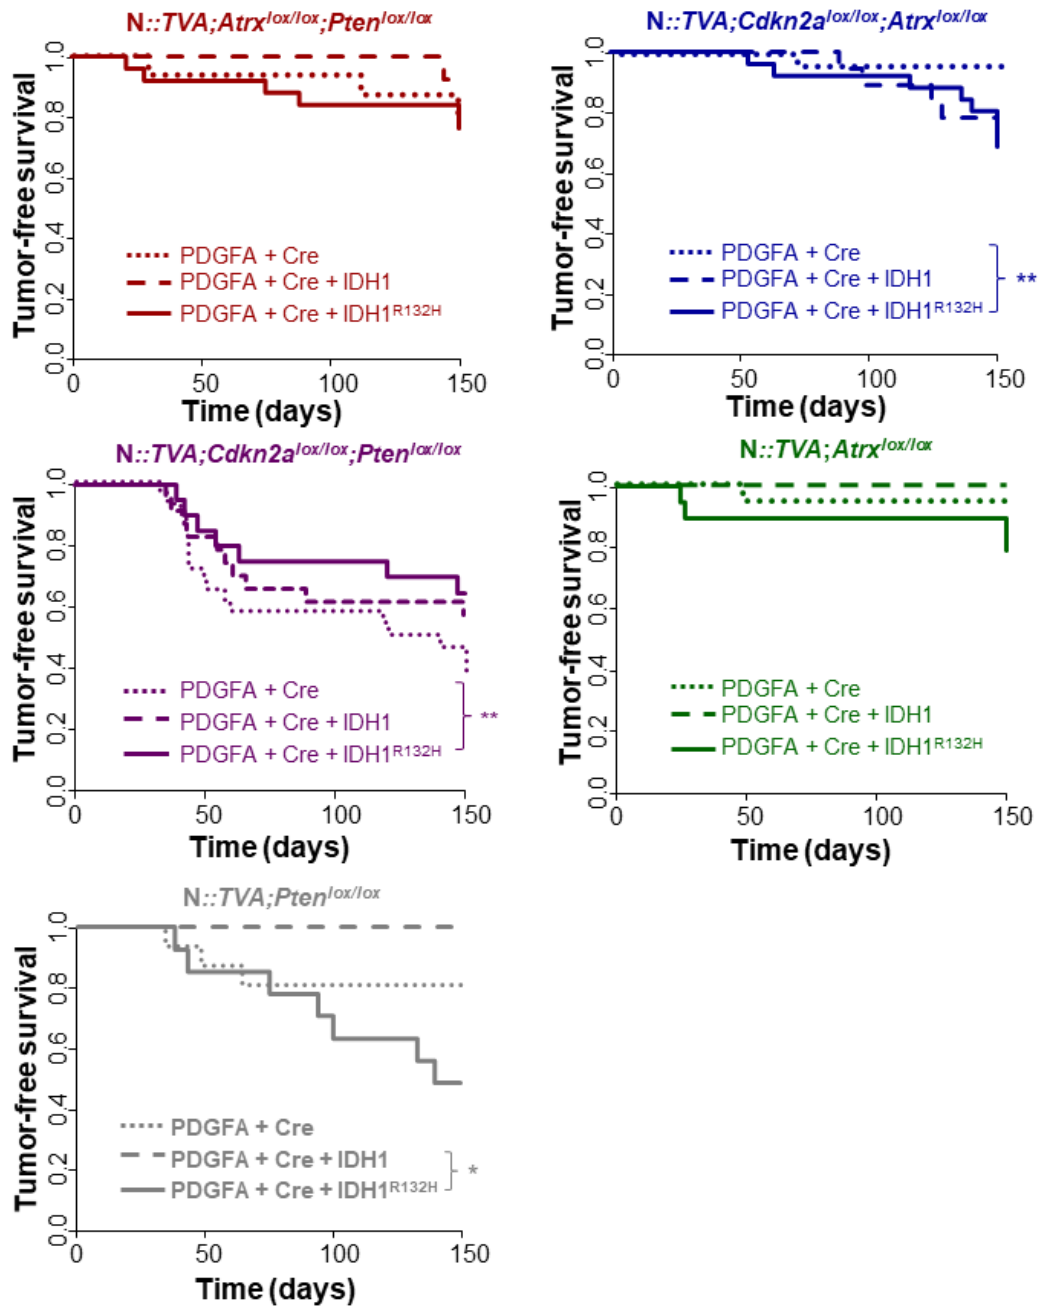

**Figure S2. Loss of *Cdkn2a*, *Atrx* and *Pten* cooperate with IDH<sup>R132H</sup> and PDGFA to promote glioma formation.**

**Related to Figure 2, Table S1, and Table S2.** Kaplan-Meier tumor-free survival analysis of the indicated mouse

strains (denoted by color) infected with viruses containing PDGFA and Cre (round dotted line), PDGFA, Cre, and

wild type IDH1 (dashed line), or PDGFA, Cre, and IDH1<sup>R132H</sup> (solid line). The number of mice in each cohort is

shown in Table S1. Statistical significance is shown by the following key: \*  $P < 0.05$ , \*\*  $P < 0.01$ , \*\*\*  $P < 0.001$ . *ns*

= not significant.

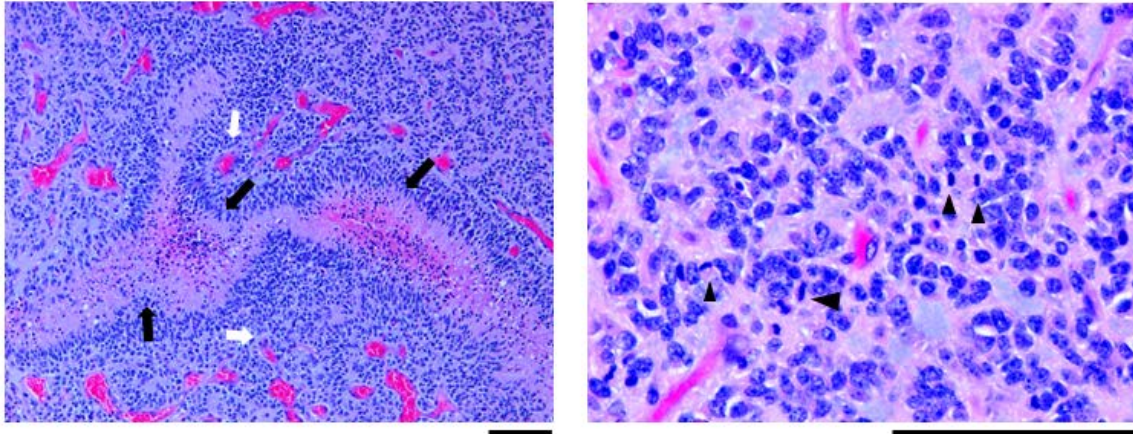

**Figure S3. Histological examination of gliomas from  $N::TVA;Cdkn2a^{lox/lox};Atrx^{lox/lox};Pten^{lox/lox}$  mice injected with viruses containing PDGFA, Cre, and IDH1<sup>R132H</sup>. Related to Figures 3 and S4. Representative H&E images showing features of GBM including pseudopalisading necrosis (black arrows), vascular proliferation (white arrows), and mitotic figures (black arrowheads). Scale bars represent 100  $\mu$ m.**

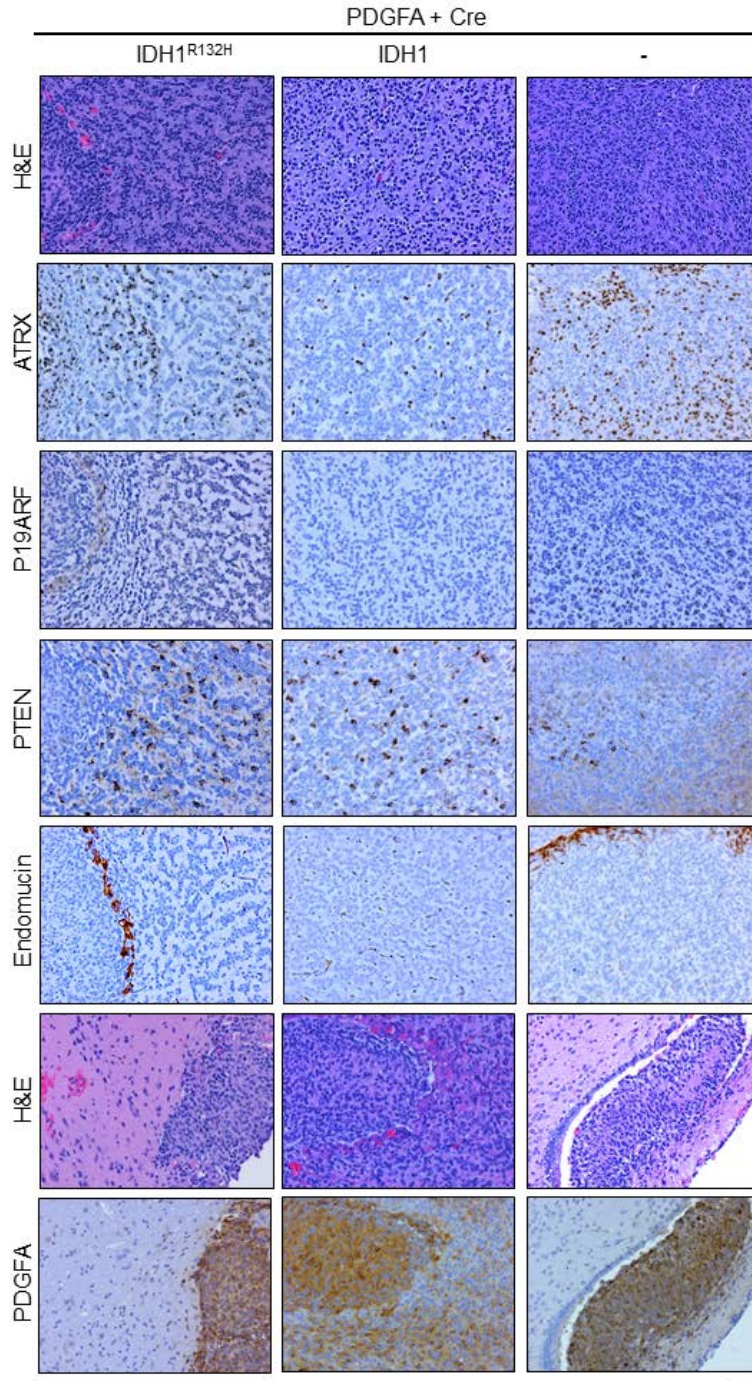

**Figure S4. Immunohistochemical staining of gliomas from *N::TVA;Cdkn2a<sup>lox/lox</sup>;Atrx<sup>lox/lox</sup>;Pten<sup>lox/lox</sup>* injected mice. Related to Figures 3 and S3.** Representative IHC sections of ATRX, P19ARF, PTEN, endomucin, and PDGFA in tumors from each strain of mice injected with viruses containing PDGFA and Cre alone (right column) or in combination with IDH1<sup>R132H</sup> (left column) or wt IDH1 (middle column) as indicated. Corresponding H&E images are included for reference. Scale bar represents 100  $\mu$ m.



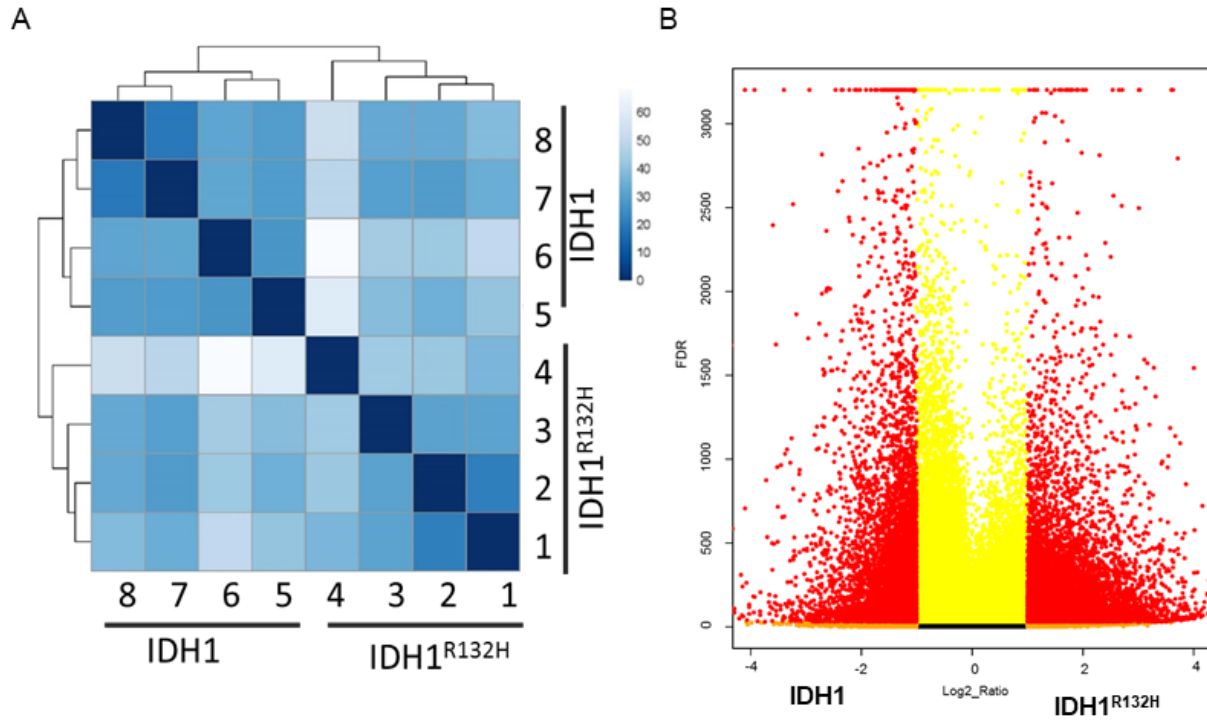

**Figure S5. IDH1<sup>R132H</sup> alters the methylation landscape in mouse gliomas. Related to Figure 6.** (A) Heat map showing the relationship between all samples, where values represent a Euclidean distance calculated in R (B) Volcano plot showing differences in DNA methylation between IDH1<sup>R132H</sup> and IDH1 samples. Each point represents a tested CpG region; points in red pass both significance and fold-change methylation.

**Table S1. Tumor incidence by genotype and injection, Related to Figure 2, Figure S2, and Table S2.**

| Genotype                                                                           | PDGFA + Cre + IDH <sup>R132H</sup> | PDGFA + Cre + IDH1 | PDGFA + Cre | Cre + IDH <sup>R132H</sup> |
|------------------------------------------------------------------------------------|------------------------------------|--------------------|-------------|----------------------------|
| N::TVA;Atrx <sup>lox/lox</sup>                                                     | 4/19(21%)                          | 0/15 (0%)          | 1/18(5%)    | 0/4(0%)                    |
| N::TVA;Cdkn2a <sup>lox/lox</sup> ;Atrx <sup>lox/lox</sup>                          | 8/25(32%)                          | 4/18(22%)          | 1/24(4%)    | 0/28(0%)                   |
| N::TVA;Atrx <sup>lox/lox</sup> ;Pten <sup>lox/lox</sup>                            | 6/26(23%)                          | 1/13 (8%)          | 3/15(20%)   | ND                         |
| N::TVA;Cdkn2a <sup>lox/lox</sup> ;Atrx <sup>lox/lox</sup> ;Pten <sup>lox/lox</sup> | 14/16(88%)                         | 3/15(20%)          | 3/15(20%)   | 0/9(0%)                    |
| N::TVA;Cdkn2a <sup>lox/lox</sup> ;Pten <sup>lox/lox</sup>                          | 7/20 (35%)                         | 10/24(42%)         | 15/29(59%)  | 0/10(0%)                   |
| N::TVA;Pten <sup>lox/lox</sup>                                                     | 7/13 (54%)                         | 0/8(0%)            | 3/15(20%)   | ND                         |

ND: not done

**Table S2. Tumor incidence and tumor-free survival by genotype for IDH1<sup>R132H</sup> and IDH1 cohorts, Related to Figure 2, Figure S2, and Table S1.**

| Mouse Strain                                                                       | Gene(s) delivered                   | Incidence  | Median tumor-free survival (days) |
|------------------------------------------------------------------------------------|-------------------------------------|------------|-----------------------------------|
| N::TVA;Atrx <sup>lox/lox</sup>                                                     | PDGFA + Cre + IDH1 <sup>R132H</sup> | 4/19(21%)  | 150 ± 9.0                         |
| N::TVA;Cdkn2a <sup>lox/lox</sup> ;Atrx <sup>lox/lox</sup>                          | PDGFA + Cre + IDH1 <sup>R132H</sup> | 8/25(32%)  | 150 ± 5.2                         |
| N::TVA;Atrx <sup>lox/lox</sup> ;Pten <sup>lox/lox</sup>                            | PDGFA + Cre + IDH1 <sup>R132H</sup> | 6/26(23%)  | 150 ± 7.4                         |
| N::TVA;Cdkn2a <sup>lox/lox</sup> ;Atrx <sup>lox/lox</sup> ;Pten <sup>lox/lox</sup> | PDGFA + Cre + IDH1 <sup>R132H</sup> | 14/16(88%) | 43.5 ± 11                         |
| N::TVA;Cdkn2a <sup>lox/lox</sup> ;Pten <sup>lox/lox</sup>                          | PDGFA + Cre + IDH1 <sup>R132H</sup> | 7/20(35%)  | 150 ± 10                          |
| N::TVA;Pten <sup>lox/lox</sup>                                                     | PDGFA + Cre + IDH1 <sup>R132H</sup> | 7/13(54%)  | 150 ± 12                          |
| N::TVA;Atrx <sup>lox/lox</sup>                                                     | PDGFA + Cre + IDH1                  | 0/15(0%)   | 150 ± 0.0                         |
| N::TVA;Cdkn2a <sup>lox/lox</sup> ;Atrx <sup>lox/lox</sup>                          | PDGFA + Cre + IDH1                  | 4/18(22%)  | 150 ± 4.5                         |
| N::TVA;Atrx <sup>lox/lox</sup> ;Pten <sup>lox/lox</sup>                            | PDGFA + Cre + IDH1                  | 1/13(8%)   | 150 ± 0.5                         |
| N::TVA;Cdkn2a <sup>lox/lox</sup> ;Atrx <sup>lox/lox</sup> ;Pten <sup>lox/lox</sup> | PDGFA + Cre + IDH1                  | 3/15(20%)  | 150 ± 8.0                         |
| N::TVA;Cdkn2a <sup>lox/lox</sup> ;Pten <sup>lox/lox</sup>                          | PDGFA + Cre + IDH1                  | 10/24(42%) | 150 ± 10                          |
| N::TVA;Pten <sup>lox/lox</sup>                                                     | PDGFA + Cre + IDH1                  | 0/8(0%)    | 150 ± 0.0                         |

## References

- Almeida, J.S., Iriabho, E.E., Gorrepati, V.L., Wilkinson, S.R., Gruneberg, A., Robbins, D.E., and Hackney, J.R. (2012). ImageJS: Personalized, participated, pervasive, and reproducible image bioinformatics in the web browser. *Journal of pathology informatics* 3, 25.
- Losman, J.A., Looper, R.E., Koivunen, P., Lee, S., Schneider, R.K., McMahon, C., Cowley, G.S., Root, D.E., Ebert, B.L., and Kaelin, W.G., Jr. (2013). (R)-2-hydroxyglutarate is sufficient to promote leukemogenesis and its effects are reversible. *Science* 339, 1621-1625.
- Lu, F., Chen, Y., Zhao, C., Wang, H., He, D., Xu, L., Wang, J., He, X., Deng, Y., Lu, E.E., *et al.* (2016). Olig2-Dependent Reciprocal Shift in PDGF and EGF Receptor Signaling Regulates Tumor Phenotype and Mitotic Growth in Malignant Glioma. *Cancer cell* 29, 669-683.
- Nix, D.A., Di Sera, T.L., Dalley, B.K., Milash, B.A., Cundick, R.M., Quinn, K.S., and Courdy, S.J. (2010). Next generation tools for genomic data generation, distribution, and visualization. *BMC bioinformatics* 11, 455.
- Robinson, J.P., VanBrocklin, M.W., Guilbeault, A.R., Signorelli, D.L., Brandner, S., and Holmen, S.L. (2010). Activated BRAF induces gliomas in mice when combined with Ink4a/Arf loss or Akt activation. *Oncogene* 29, 335-344.
- Shin, C.H., Grossmann, A.H., Holmen, S.L., and Robinson, J.P. (2015). The BRAF kinase domain promotes the development of gliomas in vivo. *Genes & cancer* 6, 9-18.
- Shin, C.H., Robinson, J.P., Sonnen, J.A., Welker, A.E., Yu, D.X., VanBrocklin, M.W., and Holmen, S.L. (2017). HBEGF promotes gliomagenesis in the context of Ink4a/Arf and Pten loss. *Oncogene*.
- Vanbrocklin, M.W., Robinson, J.P., Lastwika, K.J., McKinney, A.J., Gach, H.M., and Holmen, S.L. (2012). Ink4a/Arf loss promotes tumor recurrence following Ras inhibition. *Neuro Oncol* 14, 34-42.
- Verhaak, R.G., Hoadley, K.A., Purdom, E., Wang, V., Qi, Y., Wilkerson, M.D., Miller, C.R., Ding, L., Golub, T., Mesirov, J.P., *et al.* (2010). Integrated genomic analysis identifies clinically relevant subtypes of glioblastoma characterized by abnormalities in PDGFRA, IDH1, EGFR, and NF1. *Cancer cell* 17, 98-110.
